# Supplementary material for: SHP-1 acts as a tumor suppressor by interacting with EGFR and predicts the prognosis of human breast cancer
Source: PubMed Central journal article supplement (PMC9088191; doi:10.20892/j.issn.2095-3941.2020.0501), 2021-10-01
Supplement: cbm-19-468-s001.pdf [file cbm-19-468-s001.pdf]

## Supplementary materials

**Table S1** Expression of SHP-1 protein in matched paraffin-embedded breast cancer samples and adjacent non-cancerous specimens ( $n = 160$ )

| Pathological type           | $n$ | SHP-1 expression |                 | $P$ value |
|-----------------------------|-----|------------------|-----------------|-----------|
|                             |     | High ( $n, \%$ ) | Low ( $n, \%$ ) |           |
| Breast cancer tissue        | 160 | 90 (56.25)       | 70 (43.75)      | <0.0001   |
| Non-cancerous breast tissue | 160 | 119 (74.4)       | 41 (25.6)       | 0.012     |

**Table S2** Prognostic factors in the Cox proportional hazard model ( $n = 160$ )

| Parameters            | RR    | 95% CI       | Wald   | $P$ value |
|-----------------------|-------|--------------|--------|-----------|
| Age (years)           |       |              |        |           |
| Tumor size (cm)       |       |              |        |           |
| Lymph node metastasis | 0.903 | 0.505–1.615  | 0.118  | NS        |
| Histological grade    | 8.743 | 2.762–27.676 | 13.599 | <0.001    |
| TNM stage             | 1.844 | 0.707–4.811  | 1.564  | NS        |
| ER                    | 0.548 | 0.244–1.231  | 2.122  | NS        |
| PR                    | 0.684 | 0.289–1.617  | 0.748  | NS        |
| HER2                  |       |              |        |           |
| SHP-1 expression      | 0.512 | 0.274–0.956  | 4.413  | 0.036     |

$P < 0.05$ , indicating statistical significance. RR, relative risk; Wald, Wald value.

**Table S3** The relationship between clinicopathological characteristics and SHP-1 expression levels in patients with breast cancer ( $n = 160$ )

| Characteristics    | $n$   | SHP-1 expression |           | $\chi^2$  | $P$ value     |          |
|--------------------|-------|------------------|-----------|-----------|---------------|----------|
|                    |       | High (%)         | Low (%)   |           |               |          |
| Age (years)        | ≤50   | 76               | 41 (53.9) | 35 (46.1) | 0.312 NS      |          |
|                    | >50   | 84               | 12 (58.3) | 72 (41.7) |               |          |
| Histological grade | G1    | 18               | 6 (33.3)  | 12 (66.7) | 7.812 NS      |          |
|                    | G1-G2 | 26               | 12 (46.2) | 14 (53.8) |               |          |
|                    | G2    | 110              | 67 (60.9) | 43 (39.1) |               |          |
|                    | G2-G3 | 5                | 4 (80.0)  | 1 (20.0)  |               |          |
| TNM stage          | G3    | 1                | 1 (100)   | 0 (0.0)   |               |          |
|                    | I     | 15               | 12 (80.0) | 3 (20.0)  |               | 4.213 NS |
|                    | II    | 97               | 54 (55.7) | 43 (44.3) |               |          |
| III                | 48    | 24 (50.0)        | 24 (50.0) |           |               |          |
| ER                 | +     | 102              | 65 (63.7) | 37 (36.3) | 6.39 0.013*   |          |
|                    | –     | 58               | 25 (43.1) | 33 (56.9) |               |          |
| PR                 | +     | 79               | 51 (64.6) | 28 (35.4) | 4.376 0.04*   |          |
|                    | –     | 81               | 39 (48.1) | 42 (51.9) |               |          |
| HER-2              | +     | 43               | 22 (51.2) | 21 (48.9) | 0.618 NS      |          |
|                    | –     | 117              | 68 (58.1) | 49 (41.9) |               |          |
| EGFR               | High  | 29               | 9 (31.0)  | 20 (69.0) | 9.151 0.003** |          |
|                    | Low   | 131              | 81 (61.8) | 50 (38.2) |               |          |

\* $P < 0.05$ ; \*\* $P < 0.01$ .

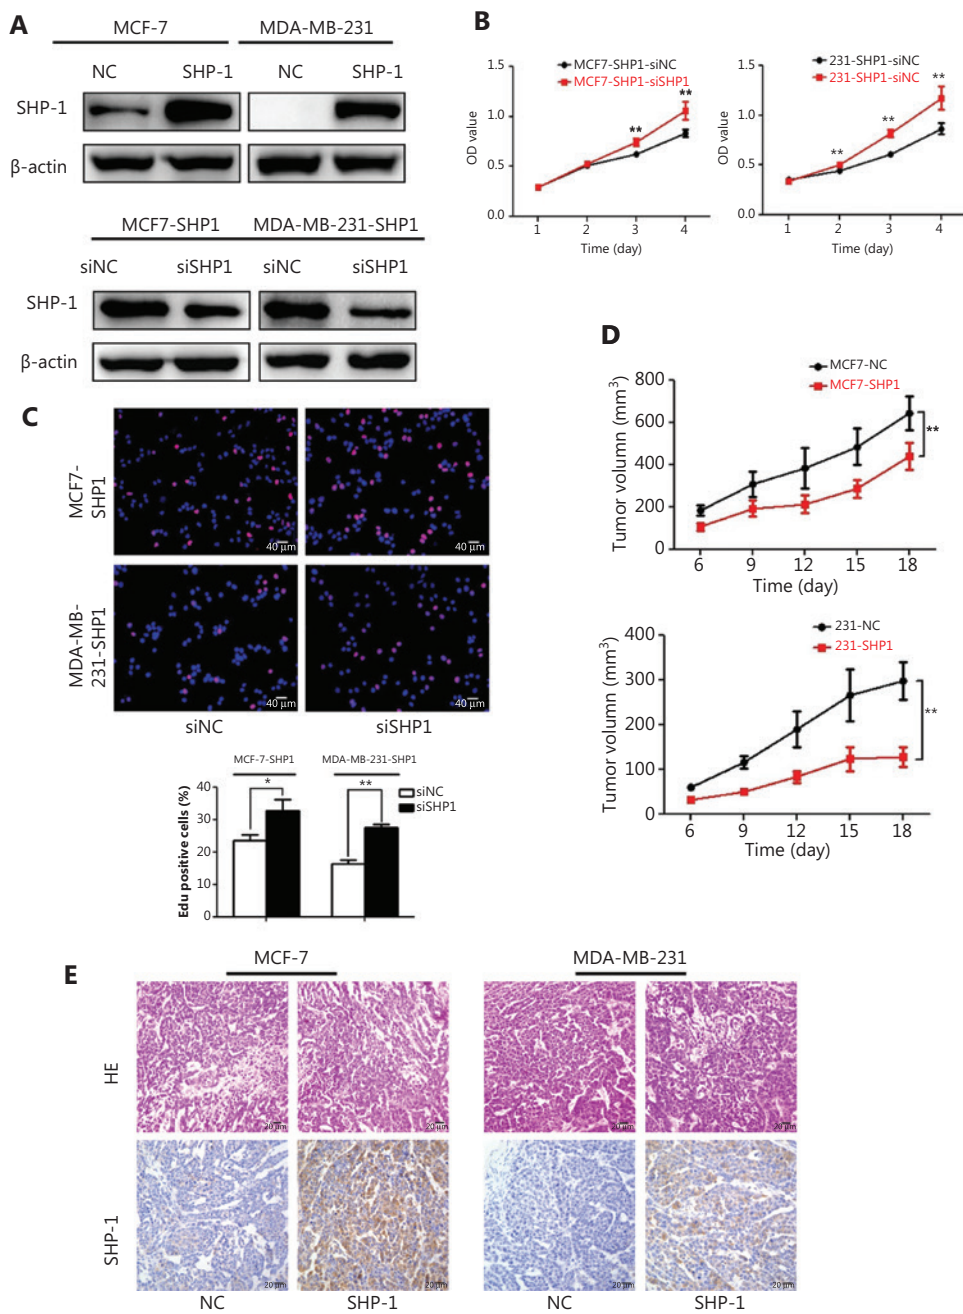

**Figure S1** Decreased SHP-1 promoted cell proliferation. (A) Western blot revealed that SHP-1 was efficiently overexpressed by treatment with pLVX-CMV-SHP1 and was knocked down by siSHP1 treatment. (B, C) MTT assays and EdU incorporation assays on MCF-7-SHP1 and MDA-MB-231-SHP1 cells after transfection with siSHP-1 or siNC. Data are presented as mean  $\pm$  SD for 3 independent experiments. (D) Tumorigenicity assays of cells overexpressing SHP-1. (E) SHP-1 protein was more highly expressed in SHP-1-overexpressing cells than control cells, on the basis of IHC assays. Scale bar, 50  $\mu$ m (HE), 20  $\mu$ m (IHC). \* $P$  < 0.05; \*\* $P$  < 0.01.

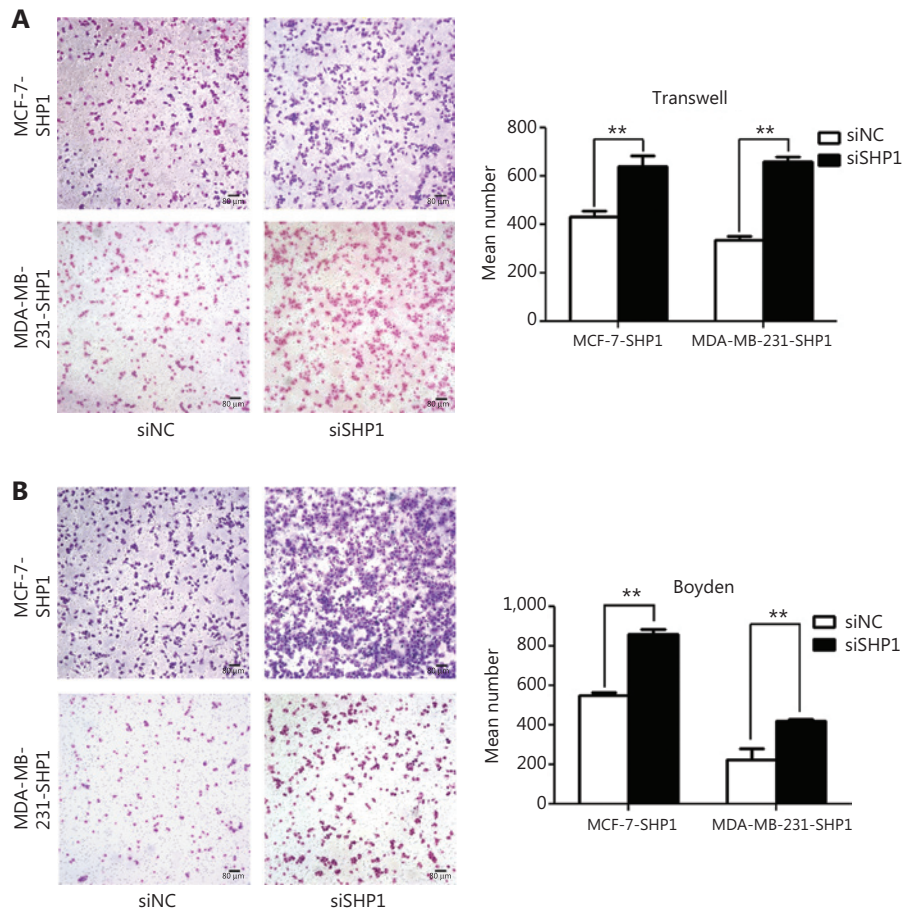

**Figure S2** SHP-1 knockdown accelerated cell migration and invasion. (A, B) Downregulation of SHP-1 accelerated cell migration and invasion of MCF-7-SHP1 and MDA-MB-231-SHP1 cells. Data are presented as mean  $\pm$  SD for 3 independent experiments. \* $P < 0.05$ ; \*\* $P < 0.01$  by Student  $t$  test.

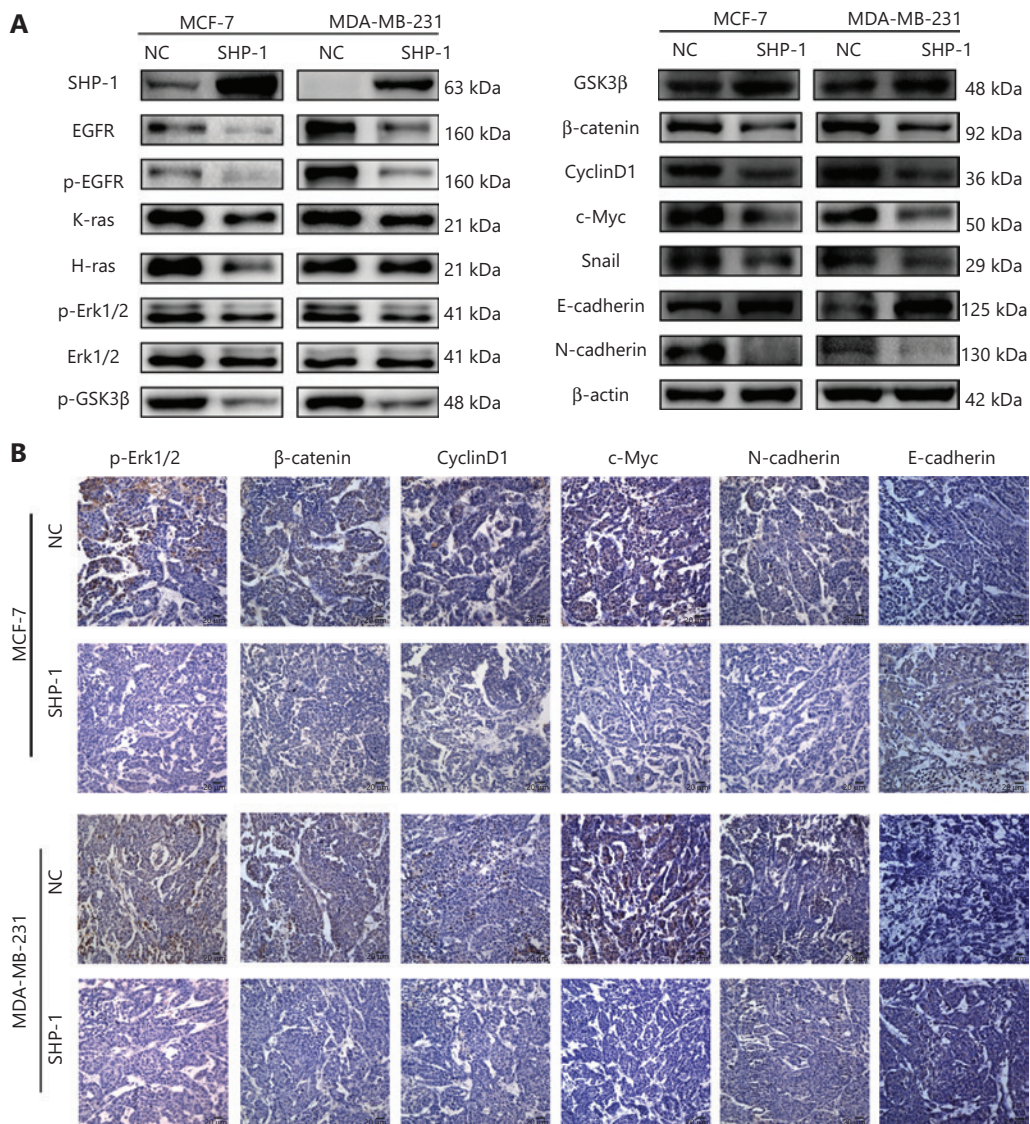

**Figure S3** Increased SHP-1 inactivated the Ras/Erk/GSK3β signaling pathway in tumor nodules originating *in vivo*. (A) EGFR, p-EGFR, k-ras, h-ras, phos-Erk1/2, p-GSK3β, β-catenin, cyclin D1, c-Myc, Snail, N-cadherin, GSK3β, and E-cadherin were measured by Western blot in nude mice with subcutaneous overexpression of SHP-1 in tumor tissues. (B) IHC of tumor nodules originating *in vivo* demonstrated that MCF-7-SHP1 and MDA-MB-231-SHP1 cells had lower p-ERK1/2, β-catenin, cyclin D1, c-Myc, and N-cadherin protein levels, and higher E-cadherin protein levels than those in the control groups. All experiments were performed at least in triplicate.
